# Supplementary material for: Varying the rheological behavior of a micellar solution via modified microscopic structures in the presence of graphene oxide
Source: Royal Society of Chemistry journal article supplement (doi:10.1039/d5ra00366k), 2025-01-01
Supplement: d5ra00366k1.pdf [file d5ra00366k1.pdf]

# **Supporting Information : Varying the rheological behavior of a micellar solution via modified microscopic structures in the presence of graphene oxide**

Takumi Kusano,\* Norihiro Oyama, Hiroaki Yoshida, and Hiroya Tanaka

*Toyota Central Research and Development Laboratories, Inc. Nagakute, Aichi, Japan*

E-mail: kusano@mosk.tytlabs.co.jp

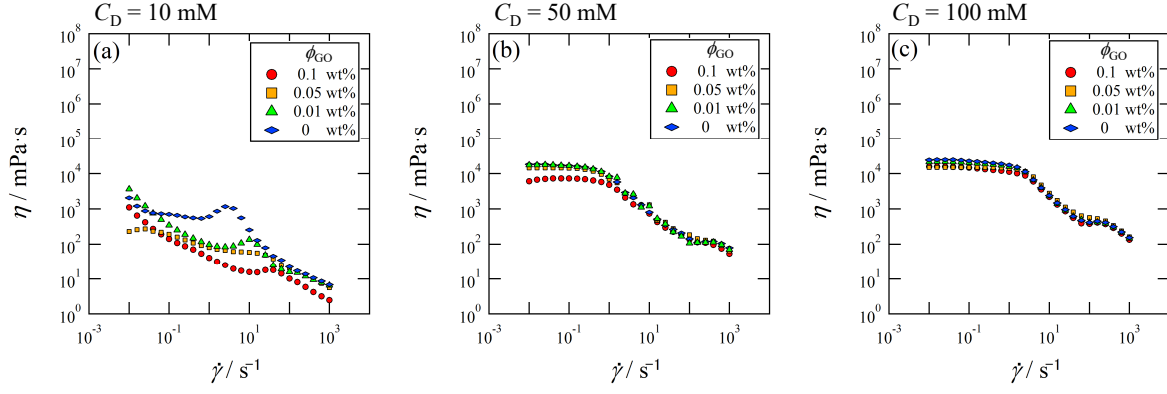

Figure S1: Log-log plot of the shear viscosity  $\eta$  of cetyltrimethylammonium bromide(CTAB)/sodium salicylate(NaSal)/graphene oxide(GO) dispersions as a function of the shear rate  $\dot{\gamma}$ . Different panels present results for systems with different concentrations of CTAB ( $C_D$ ): (a)  $C_D = 10$  mM, (b)  $C_D = 50$  mM, and (c)  $C_D = 100$  mM. NaSal concentration is identical to CTAB concentration. Symbols distinguish the concentration of the GO,  $\phi_{GO}$ , as indicated in the legend.
